# Supplementary material for: Biotransformation of 5-hydroxymethylfurfural into 2,5-dihydroxymethylfuran by Ganoderma sessile and toxicological assessment of both compounds
Source: PubMed Central journal article supplement (PMC7214591; doi:10.1186/s13568-020-01023-5), 2020-05-11
Supplement: 13568_2020_1023_MOESM3_ESM.pdf [file 13568_2020_1023_MOESM3_ESM.pdf]

**Biotransformation of 5-hydroxymethylfurfural into 2,5-dihydroxymethylfuran by *Ganoderma sessile* and toxicological assessment of both compounds**

Ya-nan Hou<sup>1#</sup>, Ya-rong Wang<sup>2#</sup>, Chun-hui Zheng<sup>1#</sup>, Kun Feng<sup>1,3\*</sup>

<sup>1</sup> Department of Bioengineering, Zhuhai Campus of Zunyi Medical University, Zhuhai 519041, Guangdong, China.

<sup>2</sup> Biological Research and Development Centre, Zhuhai Campus of Zunyi Medical University, Zhuhai 519041, Guangdong, China.

<sup>3</sup> Key Laboratory of Fundamental and Applied Research of Traditional Chinese Medicines, Zhuhai Campus of Zunyi Medical University, Zhuhai 519041, Guangdong, China.

# These authors contributed equally to this work.

\***Corresponding author.** E-mail: fengk@zmu.edu.cn

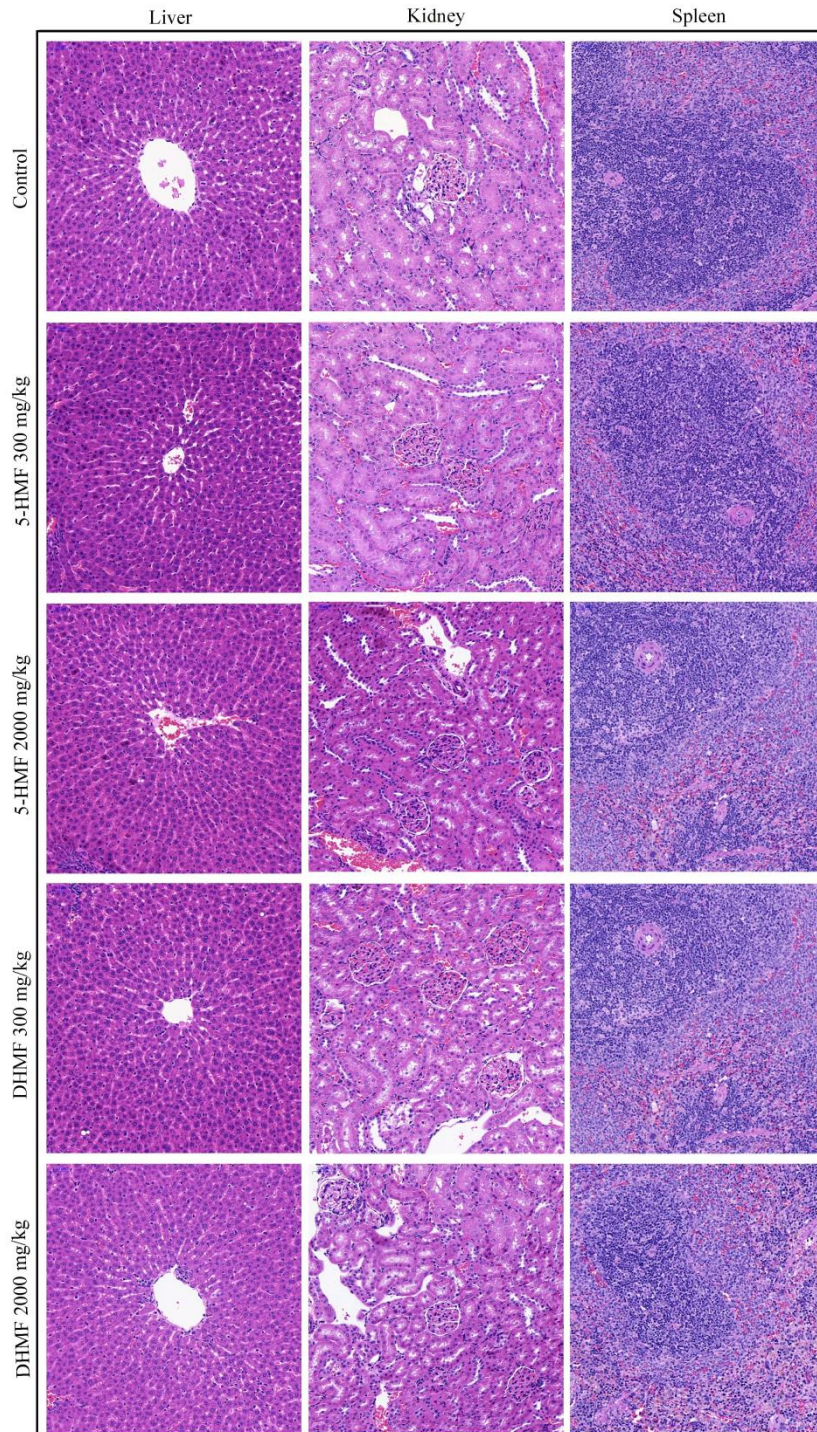

**Figure S1 Histopathological analysis of the liver, kidney and spleen (haematoxylin/eosin, 200X) of the rats treated with single dose of 5-HMF or DHMF**

Liver sections of all groups showed normal hepatic cells with well-preserved cell structure. Kidney sections of all groups showed renal tissue with normal glomeruli. Spleen section of all groups showed normal splenic architecture with normal lymphoid follicles.
